1 **Title:** Methods for the generation of heritable germline mutations in the disease vector *Culex*  
2 *quinquefasciatus* using CRISPR/Cas9.

3  
4 **List of Authors and Affiliations:**

5 Ming Li<sup>1\*</sup>, Ting Li<sup>2\*</sup>, Nannan Liu<sup>2</sup>, Robyn Raban<sup>1</sup> Xuegui Wang<sup>3</sup> and Omar S. Akbari<sup>1†</sup>

6  
7 <sup>1</sup>Section of Cell and Developmental Biology, University of California, San Diego, La Jolla,  
8 California, United States of America

9 <sup>2</sup>Department of Entomology and Plant Pathology, Auburn University, Auburn, AL, 36849, USA.

10 <sup>3</sup>College of Agriculture, Sichuan Agricultural University, Chengdu, 610006, China

11

12 \*These authors contributed equally to this work.

13 †To whom all correspondence should be addressed:

14 Omar S. Akbari

15 Section of Cell and Developmental Biology, University of California, San Diego, La Jolla,  
16 CA 92093, USA

17 Ph: 858-246-0640

18 Email: oakbari@ucsd.edu

19

20 **Keywords**

21 CRISPR, *Culex quinquefasciatus*, germline, mutations, reverse genetics, Cas9

22

23 **Abstract**

24 *Culex quinquefasciatus* is vector of many diseases that adversely impact human and animal health;  
25 however, compared to other mosquito vectors limited genome engineering technologies have been  
26 characterized for this vector. CRISPR-Cas9 based technologies are a powerful tool for genome  
27 engineering and functional genomics and consequently have transformed genomics studies in  
28 many organisms. Our objective was to improve upon the limited technologies available for  
29 genome editing in *Cx. quinquefasciatus* to create a reproducible and straightforward method for  
30 CRISPR-Cas9-targeted mutagenesis in this vector. Here we describe methods to both improve  
31 embryo survival rates as well as mutagenesis rates by optimizing injection supplies and equipment,  
32 embryo injection procedures, embryo handling and gRNA target design. Through these efforts,  
33 we achieved embryo survival rates and germline mutagenesis rates that greatly exceed any  
34 previously reported rates in this vector. This work was also the first characterize the *white* gene  
35 marker, which is a valuable phenotypic marker for future transgenesis or mutagenesis of this  
36 vector. In the end, these tools provide the framework for future functional genomic studies in this  
37 important disease vector and may support the development of future gene drive and genetic  
38 technologies that can be used to control this vector.

39

40 **Introduction**

41 *Culex quinquefasciatus* is a primary vector of West Nile virus (WNV), eastern equine encephalitis  
42 virus, Saint Louis encephalitis virus, lymphatic filariasis and avian malaria (Reisen et al. 2005;  
43 Jones et al. 2002; Petersen & Roehrig 2001; LaPointe et al. 2005). Since the introduction of WNV  
44 to the United States in 1999, there have been over 48,000 confirmed cases of WNV in the United  
45 States (CDC, ArboNET). While this is certainly and underestimate of the overall impact of this  
46 disease in the US, the global impact of lymphatic filariasis is far greater. Current estimates indicate

47 that despite remarkable mass drug administration (MDA) programs, millions of people are  
48 currently infected with lymphatic filariasis, which is considered to be one of the leading global  
49 causes of disability (Gyapong et al. 2018). Furthermore, there are many areas of the world where  
50 MDA is not expected to eradicate this disease, but mosquito control could be the key to eliminating  
51 this disease (Koudou et al. 2018). Moreover, *Cx. quinquefasciatus* has established itself as the  
52 dominant vector of avian malaria in many island habitats, and in some instances caused the  
53 extinction of many rare bird species (LaPointe et al. 2012). Thus, technologies to improve *Cx.*  
54 *quinquefasciatus* control are essential to reduce and potentially eliminate these diseases. However,  
55 the widespread development of insecticide resistance in *Cx. quinquefasciatus*, the primary method  
56 for control of this vector, has made it imperative that alternative control methods are developed  
57 for this vector.

58  
59 Genome engineering technologies facilitate important functional genomic research as well as the  
60 development of tools required to create genetic control strategies for important disease vectors.  
61 Recently, the clustered regularly interspaced short palindrome repeats (CRISPR)-associated  
62 protein 9 (CRISPR-Cas9) system has been used to generate somatic and heritable germline  
63 mutations and genetic drive technologies in *Aedes* (Li, Bui, et al. 2017; Kistler et al. 2015) and  
64 *Anopheles* (Li et al. 2018; Dong et al. 2018; Gantz et al. 2015; Hammond et al. 2016; Kyrou et al.  
65 2018) disease vectors. In this system, a Cas9 endonuclease and a small guide RNA (sgRNA)  
66 complementary to the target site facilitate site directed double stranded genome breaks, which are  
67 repaired by homology directed repair (HDR) or nonhomologous end joining (NHEJ). Despite this  
68 being a useful mutagenesis tool in other vector species, there has been limited emphasis on  
69 improving CRISPR genome engineering technologies to study and develop new control tools for  
70 *Culex* disease vectors. In 2016, transcription activator-like effector nucleases (TALEN) and  
71 CRISPR-Cas9 genome engineering technologies were used to generate frameshift mutations to  
72 disrupt the function of an insecticide resistance gene in *Cx. quinquefasciatus* (Itokawa et al. 2016),  
73 but no additional CRISPR/Cas9 mutagenesis work has been published for this vector.  
74 Furthermore, with the publication of the *Cx. quinquefasciatus* genome in 2010 (Arensburger et al.  
75 2010), there have been few functional genomic studies of this species, which is unfortunate due to  
76 not only its importance as a disease vector, but its unique biological characteristics (Severson &  
77 Behura 2012) including its susceptibility to diverse pathogens (i.e. viral, nematode and protozoan)  
78 (Bartholomay et al. 2010), opportunistic blood feeding behavior (i.e. birds, humans and other  
79 mammals) as well as diverse geographic and habitat preferences. Therefore, in order to make  
80 CRISPR technologies more accessible to the research community, we aim to meticulously describe  
81 the development of a CRISPR-Cas9 mutagenesis system for *Cx. quinquefasciatus* targeting the  
82 *white* gene. This is the first characterization of this gene in *Cx. quinquefasciatus*, which has been  
83 an important phenotypic marker for genome engineering of other mosquito vectors (Coates et al.  
84 1997). We hope that this tool will be useful for further functional genomics studies in this  
85 important disease vector and may lay the framework for the development of genetic control tools.

## 86 87 **Results**

### 88 Development of an CRISPR/Cas9 embryo microinjection protocol

89 We established efficient techniques for egg collection, pre-blastoderm stage embryo  
90 microinjection, and subsequent rearing and genetics. In brief, we first optimized the injection  
91 protocol by evaluating different types of capillary glass needles (quartz, aluminosilicate,  
92 borosilicate). The needle pulling settings were also optimized to minimize breakage and clogging

93 during the injection procedures, while still maximizing embryo survival. Table S2 shows the  
94 optimal needle pulling parameters for all 3 needle types, but we found the aluminosilicate needles  
95 to produce the highest embryo survival at the most affordable costs.

96  
97 We then conducted experiments to optimize the mosquito handling procedures. The mosquito  
98 mating, blood feeding and oviposition procedures were varied slightly with no large resulting  
99 effect, but egg raft separation and handling was key to obtaining high embryo survival rates.  
100 Methods that optimized egg separation and handling are outlined in the materials and methods.  
101 Furthermore, careful removal of the halocarbon injection oil from the eggs with a paintbrush, was  
102 also key to ensuring high embryo survival rates. Once the eggs were hatched, screening was  
103 performed my standard methods.

104

#### 105 Identification of CRISPR/Cas9 target sites

106 To test the efficiency of our CRISPR/Cas9 based genome editing platform in *Cx. quinquefasciatus*,  
107 we targeted the *white* (*w*) gene (CPIJ005542), which codes a protein critical for eye pigment  
108 transport. In other species, biallelic mutations in the *w* gene disrupts production of dark eye  
109 pigmentation and generates an easily screenable unpigmented eye color (Li, Bui, et al. 2017; Li et  
110 al. 2018; Ren et al. 2014; Bassett et al. 2014; Xue et al. 2018). Consequently, we designed three  
111 single-guide RNAs (sgRNAs) targeting three conserved regions of the third exon of the *w* gene  
112 (Fig. 2A). Target site conservation was confirmed in the CpipJ2 assembly of the Johannesburg  
113 strain of *Cx. quinquefasciatus* (www.vectorbase.org). Off-target effects were evaluated with  
114 CHOPCHOP v2 software (Labun et al. 2016), CRISPRdirect (<https://crispr.dbcls.jp/>) and a local  
115 sgRNA Cas9 package (Xie et al. 2014).

116

#### 117 Mutagenesis of the *white* gene locus in *Culex quinquefasciatus*

118 Our previous transgenesis work in *Aedes* (Li, Bui, et al. 2017) and *Anopheles* (Li et al. 2018) and  
119 our work the parasitoid wasp, *Nasonia vitripennis* (Li, Au, et al. 2017), demonstrated that  
120 sgRNA/Cas9 directed mutagenesis is dose dependent. Therefore, since *Cx. quinquefasciatus* eggs  
121 are larger than *Aedes* and *Anopheles* mosquitoes eggs, we used slightly higher concentrations of  
122 gRNA and Cas9 protein (200 ng/μl sgRNA and 200 ng/μl Cas9) compared to these other species  
123 in these experiments. Embryo survival post-microinjection ranged from 64-82% and somatic  
124 mutagenesis rates (*i.e.*, mosaic eyes, with an intermediate wildtype black and white knockout  
125 phenotype, Fig. 1B) were 37 - 57% for single gRNA injections (Table 1). Notably, coinjection  
126 with two or more sgRNAs targeting different gene regions of *w* including: a) *w*sgRNA-1 and  
127 *w*sgRNA-2, b) *w*sgRNA-1 and *w*sgRNA-3, c) *w*sgRNA-2 and d) *w*sgRNA-3, *w*sgRNA-1, -2 and  
128 *w*sgRNA-3) increased G<sub>0</sub> mutagenesis efficiencies to 74%, 73%, 78% and 86%, respectively.  
129 These results indicate that by using increased concentrations of CRISPR/Cas9 components we can  
130 achieve high single and multi-target somatic mutagenesis rates in *Cx. quinquefasciatus*, which is  
131 key to efficient CRISPR-mediated genome engineering in *Cx. quinquefasciatus*.

132

133

#### 134 Heritable mutations rates

135 Given the above promising results demonstrating efficient somatic editing, we next wanted to test  
136 for germline editing as this is required for heritable transmission of the engineered mutations.  
137 Germline mutation transmission efficiency from Cas9-directed genome engineering in *Cx.*  
138 *quinquefasciatus* was determined by intercrossing mosaic G<sub>0</sub> males and females. The percentage

139 of complete white eyed G<sub>1</sub> progeny (Fig. 1C) in single target injections are shown in Table 1. G<sub>1</sub>  
140 mutation rates increased to >79% when co-injected with multiple sgRNAs targeting different  
141 regions of the *w* gene. Deletion and insertion mutations in several independent mutant G<sub>2</sub> lines  
142 were confirmed by sequencing the genomic DNA fragment containing the *w*sgRNA target sites  
143 (Fig. 2B). Some of the gene deletions were large, up to 43 bp (Fig. 2B). Homozygous viable  
144 healthy and fertile stocks were established for some of these *w* mutant lines indicating that this  
145 gene is not essential. Taken together, these results demonstrate that this method can generate  
146 germline mutations that can be inherited at a high rate and the efficiency of this inheritance is  
147 improved by synchronous injection of more than one sgRNA targeting different regions in the  
148 same gene.

149

## 150 Discussion

151 The Itokawa et al. study is a great example of the important and high impact research that can be  
152 achieved with CRISPR/Cas9 mutagenesis in *Cx. quinquefasciatus*; however, this work did not  
153 provide the detail needed to effectively use this technology for future functional genomics studies  
154 in this vector, nor did it optimize the gRNA design, injection mixtures, egg handling and  
155 microinjection procedures (Itokawa et al. 2016). These details are particularly important as the  
156 unique biology of the *Culex* species eggs, which are laid in raft structures, require modifications  
157 from the standard microinjection procedures used for mosquitoes that lay single eggs, such as  
158 *Aedes* or *Anopheles* species. Proper separation, handling and injection of these egg rafts is not easy  
159 and took us many rounds of refinement to achieve the high survival and mutagenesis rates in this  
160 study. Earlier work that better describes *Cx. quinquefasciatus* microinjection procedures for  
161 *Hermes* transposable element-based transgenesis still had consistently lower survival rates (range  
162 5 - 40% survival) (Allen et al. 2001) compared to our procedures (range 42-82% survival). Post  
163 injection survival rates were unreported in the 2016 study (Itokawa et al. 2016), so it is unclear  
164 whether they were more successful in their study, but as not enough details on methodology is  
165 provided, these results are unlikely to be recapitulated in another laboratory without significant  
166 troubleshooting.

167

168 Additionally, our work also outlines methods to optimize gRNA targeting and multiplexing to  
169 improve mutagenesis rates. Consequently, our design methods resulted in an increase in the  
170 mutagenesis rate of up to 26% for single gRNAs and up to a 40% for multiplexed gRNAs  
171 compared to the previous study (Itokawa et al. 2016) (Table 1). These improvements in survival  
172 and mutagenesis rates will make CRISPR-based technologies less laborious and more affordable  
173 to researchers and may even be generalizable enough to apply to other *Culex* species. Moreover,  
174 this is the first characterization of the *white* gene marker in *Cx. quinquefasciatus*, which is common  
175 phenotypic marker used in other mosquito species (Coates et al. 1997). This easily screenable  
176 phenotypic marker can be used to simplify the generation of new genetic tools and future  
177 functional genomic studies in this species. In the end, these procedures should provide the step by  
178 step instructions for the CRISPR/Cas9 directed mutagenesis of *Cx. quinquefasciatus* in any  
179 laboratory with the appropriate insectary facilities and therefore we think this work is an important  
180 step towards bridging the gaps in research for this important, but frequently overlooked, disease  
181 vector.

182

183



184

## 185 **Experimental Procedures**

### 186 Mosquito strain and rearing

187 We used the *Cx. quinquefasciatus* wild-type S-strain (Li & Liu 2014) for these studies. Mosquitoes  
188 were maintained at the University of California, San Diego (UCSD). Mosquitoes were raised at  
189  $25.0 \pm 1$  °C with 30% humidity and a 12-hour light/dark cycle. A 20% sugar solution was provided  
190 daily. Females were offered a bovine blood meal using the Hemotek (model# PS5) blood feeding  
191 system.

192

### 193 sgRNA design and generation

194 gRNAs were designed to target both the sense and antisense strand of exon 3 of the *white* gene  
195 (CPIJ005542). Target and protospacer-adjacent motif (PAM) regions were selected using  
196 CHOPCHOPv2 (<http://chopchop.cbu.uib.no/>) and CRISPR Design (<http://crispr.mit.edu/>) (Xie et  
197 al. 2014). Linear, double-stranded DNA templates for sgRNAs were generated by performing  
198 template-free PCR with Q5 high-fidelity DNA polymerase (NEB) using the forward primer of  
199 each gRNA, and universal-sgRNAR. PCR conditions included an initial denaturation step of 98°  
200 for 30 seconds, followed by 35 cycles of 98° for 10 seconds, 58° for 10 sec, and 72° for 10 seconds,  
201 followed by a final extension at 72° for 2 min. PCR products were purified with magnetic beads  
202 using standard protocols. gRNAs were generated by *in vitro* transcription (AM1334; Life  
203 Technologies) using 300 ng purified DNA as template in an overnight reaction incubated at 37°C.  
204 MegaClear columns (AM1908; Life Technologies) were used to purify sgRNAs, which were then  
205 diluted to 1 µg/µl, aliquoted, and stored at 80° until use. Off-target sites of each sgRNA were  
206 identified based on the CHOPCHOPv2 software (Xie et al. 2014; Labun et al. 2016) and local  
207 sgRNACas9 package (Xie et al. 2014). All primer sequences are listed in Supplemental Material,  
208 Table S1 in [File S1](#). Recombinant Cas9 protein from *Streptococcus pyogenes* was purchased from  
209 PNA Bio (CP01) and diluted to 1 µg/µl in nuclease-free water with 20% glycerol, and stored  
210 in aliquots at -80°.

211

### 212 Preparation of sgRNA/Cas9 mixtures for microinjection

213 The stock Cas9 protein solution was diluted with nuclease free water and mixed with the purified  
214 sgRNAs at various concentrations (20-320 ng/ul) in small 5-10ul aliquots to avoid excess freeze-  
215 thaw-cycles. These ready-to-inject mixtures were stored at -80C until needed. Mixtures were then  
216 thawed and maintained on ice while performing injections.

217

### 218 Preparation of needles for embryo microinjection

219 For effective penetration and microinjection into *Cx. quinquefasciatus* eggs, we experimented with  
220 several types of capillary glass needles with filament including quartz, aluminosilicate and  
221 borosilicate types. The quality of needles is critical for avoiding breakage/clogging during  
222 injection, embryo survival and transformation efficiency. For each of these glass types we  
223 developed effective protocols to pull these needles on different Sutter micropipette pullers (P1000,  
224 and P-2000) to enable the needles to have a desired hypodermic-like long tip that we found  
225 effective for *Cx. quinquefasciatus* embryo microinjection. The parameters (filament, velocity,  
226 delay, pull, pressure) for the different types of capillary glass needles are listed in the following  
227 table. While all three types of needles were effective for *Cx. quinquefasciatus* injections, we  
228 preferred the aluminosilicate capillary glass needles, because the quartz capillary glass needles

229 were too expensive, and the borosilicate capillary glass needles were a bit too soft and clogged  
230 easily. All needles were beveled with a Sutter BV-10 beveler.

231

### 232 Embryo preparation and microinjection

233 Mixed sex pupae were allowed to eclose into a single (L24.5 × W24.5 × H24.5 cm) cage. Five  
234 days post emergence, mated females were offered a bovine blood meal using the Hemotek (model#  
235 PS5) blood feeding system. Then females were held for three to five days to allow oogenesis, after  
236 which oviposition cups with organically infused water were introduced into cages. Females were  
237 allowed to oviposit in the dark for 20-35 minutes. Fresh egg rafts (white color) were transferred  
238 from the cup to a wet filter paper with paintbrush. Single eggs were carefully separated for the  
239 egg raft under a dissecting scope with forceps. Single embryos were then aligned and a coverslip  
240 with double-sided sticky tape was used to secure the eggs. The eggs were then covered with  
241 halocarbon oil.

242

243 An Eppendorf Femtojet for the microinjections, which were performed under a compound  
244 microscope at 100× magnification. Needles were filled with 2 µls of injection mix and each egg  
245 was injected with the injection mixture at approximately 10% of the egg volume. We injected  
246 approximately 20 eggs per round and then carefully remove the halocarbon oil with a paintbrush.  
247 Eggs were then rinsed in ddH<sub>2</sub>O and monitored for daily for hatching over the next week.

248

### 249 Mutation screens

250 The phenotype of G<sub>0</sub> and G<sub>1</sub> mosquitoes was assessed and photographed under a Leica M165 FC  
251 stereomicroscope. To molecularly characterize CRISPR/Cas9-induced mutations, genomic DNA  
252 was extracted from a single mosquito with a DNeasy blood & tissue kit (QIAGEN) and target loci  
253 were amplified by PCR. For T7EI assays, 1 µl of T7EI (NEB) was added to 19 µl of PCR product,  
254 digested for 15 min at 37°, and visualized on a 2% agarose electrophoresis gel stained with  
255 ethidium bromide. To characterize mutations introduced during NHEJ or MMEJ, PCR products  
256 containing the sgRNA target site were amplified, cloned into TOPO TA vectors (Life  
257 Technologies), purified, and Sanger sequenced at the source bioscience  
258 (<https://www.sourcebioscience.com/>).

259

### 260 **Data availability**

261 Genomic DNA from mosquito strains produced here will be made available upon request.

262

### 263 **Acknowledgements**

264 This work was supported in part by UCSD startup funds directed to O.S.A.

265

### 266 **Author Contributions**

267 O.S.A, M.L and T.L. conceived and designed the experiments. M.L. and T.L. performed all  
268 molecular and genetic experiments. All authors contributed to the writing, analyzed the data, and  
269 approved the final manuscript.

270

### 271 **Disclosure**

272 The authors declare no competing financial interests.

273  
274

## Figures and Tables

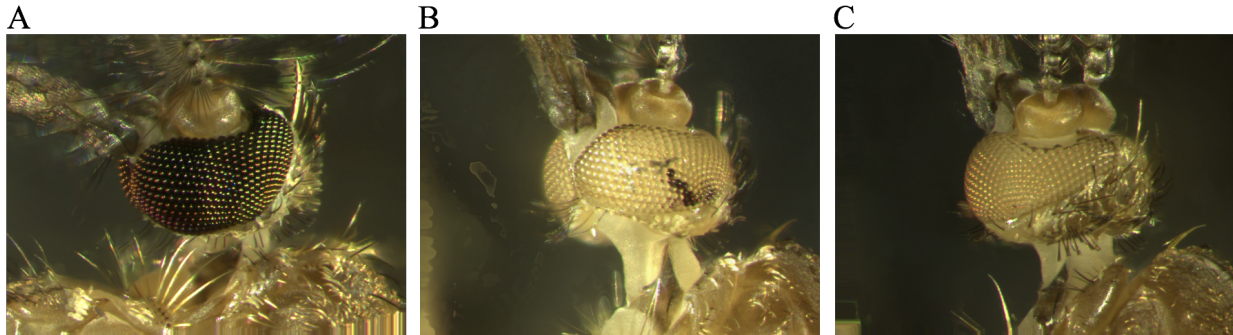

275  
276 **Figure 1.** CRISPR/Cas9 efficiently generates heritable, site-specific mutations in *Culex*  
277 *quinquefasciatus*. (A) Representative image of wild-type *Cx. quinquefasciatus* adult eyes. (B)  
278 Representative G<sub>0</sub> mosaic white-eyed mutant mosquito post-embryonic injection with a mixture  
279 of three unique sgRNAs targeting the *white* gene and the Cas9 endonuclease. (C) representative  
280 homozygous white-eyed mutant G<sub>1</sub> mosquito generated by pairwise crossing mosaic G<sub>0</sub> male and  
281 female mosquitoes. CRISPR, clustered regularly interspaced short palindromic repeats; sgRNA,  
282 small guide RNA.

283  
284  
285  
286

287  
288

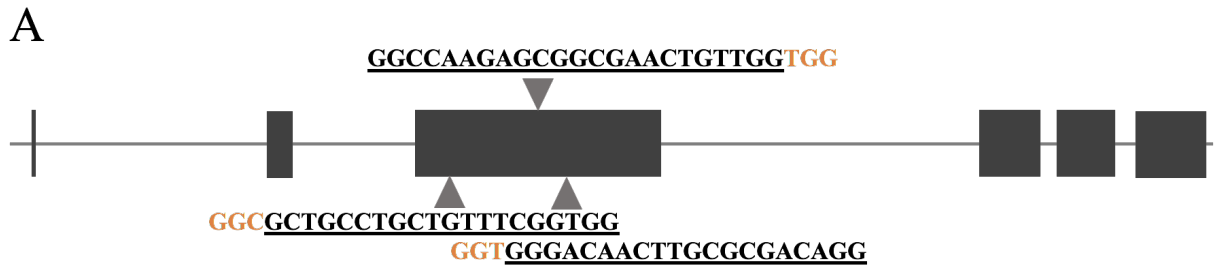

**B**

|    |                                                              |         |
|----|--------------------------------------------------------------|---------|
| WT | CCTTGGCCTGCTGCCGTAGTTGGTACGGCGCTGCCTGCTGTTTCGGTGGGAGTAGGTCCA |         |
|    | CCTTGGCCTGCTGCCGTAGTTGGTACGGCGC-----GCTGTTTCGGTGGGAGTAGGTCCA | -5      |
|    | CCTTGGCCTGCTGCCGTAGTTGGT-----CTGCTGTTTCGGTGGGAGTAGGTCCA      | -10     |
|    | CCTTGGCCTGCTGCCGTAGTTGGTACGGCGCTGA-----AGGTCCA               | -20, +1 |
| WT | ACGTGACCGGCATGGCCAAGAGCGGCGAACTGTTGGCCCGTATGGGCAGTTCCGGTGCGG |         |
|    | ACGTGACCGGCATGGCCAAGAGCGGCGT--TGTGGCCGTATGGGCAGTTCCGGTGCGG   | -3, +1  |
|    | ACGTATT-----AGTTCCGGTGCGG                                    | -43, +3 |
|    | ACGTGACCGGCATGGCCAAGAGCGGCGA-----TGGGCAGTTCCGGTGCGG          | -14     |
| WT | ACCCGTCAAGGCCACGCCCGTTCTGGTGGGACAACTTGCGCGACAGGAAGTCTAGTGGCG |         |
|    | ACCCGTCAAGGCCACGCCCGTTCTCCGCA-----TGC GCGACAGGAAGTCTAGTGGCG  | -12, +5 |
|    | ACCCGTCAAGGCCACGCCCGTTCTC-----CGCGACAGGAAGTCTAGTGGCG         | -14, +1 |
|    | ACCCGTCAAGGCCATC-----CAACTTGCGCGACAGGAAGTCTAGTGGCG           | -17, +2 |

289  
290  
291  
292  
293  
294  
295

**Figure 2.** Mutagenesis of the *white* locus. (A) Schematic representation of the *white* locus with exons indicated as black boxes. Locations and sequences of the three sgRNA targets are indicated with the protospacer-adjacent motifs (PAM) highlighted in orange. (B) Genomic sequencing analysis of indels from individuals sequenced from the sgRNA injections. Top line represents wild-type (WT) sequence; PAM sequences (NGG) are indicated in yellow, and white gene disruptions resulting from insertions/deletions are indicated in red.



296  
297  
298  
299

**Table 1** Summary of the injection and mutagenesis mediated by independent sgRNAs in *Culex quinquefasciatus*

| sgRNA                      | #injected | Survival |    |           | Somatic Mosaicism (G <sub>0</sub> ) |         |           | Germline Mosaicism (G <sub>1</sub> ) |
|----------------------------|-----------|----------|----|-----------|-------------------------------------|---------|-----------|--------------------------------------|
|                            |           | ♀        | ♂  | Total (%) | ♀ (%)                               | ♂ (%)   | Total (%) | G <sub>1</sub> mutants (%)           |
| wsgRNA-1                   | 50        | 15       | 20 | 35 (70)   | 7 (47)                              | 13 (65) | 20 (57)   | 128 (69)                             |
| wsgRNA-2                   | 50        | 9        | 32 | 41 (82)   | 3 (33)                              | 12 (38) | 15 (37)   | 51 (61)                              |
| wsgRNA-3                   | 50        | 17       | 15 | 32 (64)   | 7 (41)                              | 8 (53)  | 15 (46)   | 157 (72)                             |
| wsgRNA-1/wsgRNA-2          | 50        | 7        | 16 | 23 (46)   | 5 (71)                              | 12 (75) | 17 (74)   | 123 (79)                             |
| wsgRNA-1/wsgRNA-3          | 50        | 13       | 9  | 21 (45)   | 10 (77)                             | 6 (67)  | 16 (73)   | 72 (81)                              |
| wsgRNA-1/wsgRNA-3          | 50        | 17       | 10 | 27 (54)   | 13 (76)                             | 8 (80)  | 21 (78)   | 101 (85)                             |
| wsgRNA-1/wsgRNA-2/wsgRNA-3 | 50        | 11       | 10 | 21 (42)   | 9 (82)                              | 9 (90)  | 18 (86)   | 149 (86)                             |

300  
301  
302  
303

304  
305  
306  
307  
308

**Table S1** Primer sequences used in this study

| Primer name      | Primer sequence (5'-3')                                                             |
|------------------|-------------------------------------------------------------------------------------|
| sgRNAF1          | GAAATTAATACGACTCACTATAGGCCAAGAGCGGCGAACTGT<br>GTTTTAGAGCTAGAAATAGC                  |
| sgRNAF2          | GAAATTAATACGACTCACTATAGGTGGCTTTGTCGTCCGTCGG<br>TTTTAGAGCTAGAAATAGC                  |
| sgRNAF3          | GAAATTAATACGACTCACTATAGGACAGCGGTTCAACAGGG<br>GTTTTAGAGCTAGAAATAGC                   |
| PCRF             | GAGCTGCGAATCGAGGAATTA                                                               |
| PCRR             | ATGTTTCCTTGGTGGTGAGTG                                                               |
| Universal-sgRNAR | AAAAGCACCGACTCGGTGCCACTTTTTCAAGTTGATAACGGAC<br>TAGCCTTATTTAACTTGCTATTTCTAGCTCTAAAAC |

309  
310

311  
312 **Table S2: Optimized needle settings to limit needle breakage and clogging and to improve**  
313 **survival and transgenesis rates**

| Capillary glass needle type | Sutter Needle Puller mode | Heat | Filament | Velocity | Delay | Pull | Pressure |
|-----------------------------|---------------------------|------|----------|----------|-------|------|----------|
| Quartz                      | P-2000                    | 750  | 4        | 40       | 180   | 135  | -        |
| Aluminosilicate             | P-1000                    | 605  | -        | 130      | 80    | 70   | 500      |
| Borosilicate                | P-1000                    | 450  | -        | 90       | 80    | 70   | 500      |

314

## 315 **References**

- 316 Allen, M.L. et al., 2001. Stable, germ-line transformation of *Culex quinquefasciatus* (Diptera:  
317 Culicidae). *Journal of medical entomology*, 38(5), pp.701–710.
- 318 Arensburger, P. et al., 2010. Sequencing of *Culex quinquefasciatus* establishes a platform for  
319 mosquito comparative genomics. *Science*, 330(6000), pp.86–88.
- 320 Bartholomay, L.C. et al., 2010. Pathogenomics of *Culex quinquefasciatus* and meta-analysis of  
321 infection responses to diverse pathogens. *Science*, 330(6000), pp.88–90.
- 322 Bassett, A.R. et al., 2014. Highly Efficient Targeted Mutagenesis of *Drosophila* with the  
323 CRISPR/Cas9 System. *Cell reports*, 6(6), pp.1178–1179.
- 324 Coates, C.J. et al., 1997. The white gene from the yellow fever mosquito, *Aedes aegypti*. *Insect*  
325 *molecular biology*, 6(3), pp.291–299.
- 326 Dong, Y. et al., 2018. CRISPR/Cas9 -mediated gene knockout of *Anopheles gambiae* FREP1  
327 suppresses malaria parasite infection. *PLOS Pathogens*, 14(3), p.e1006898. Available at:  
328 <http://dx.doi.org/10.1371/journal.ppat.1006898>.
- 329 Gantz, V.M. et al., 2015. Highly efficient Cas9-mediated gene drive for population modification  
330 of the malaria vector mosquito *Anopheles stephensi*. *Proceedings of the National Academy*  
331 *of Sciences of the United States of America*, 112(49), pp.E6736–43.
- 332 Gyapong, J.O. et al., 2018. Elimination of lymphatic filariasis: current perspectives on mass drug  
333 administration. *Research and reports in tropical medicine*, 9, pp.25–33.
- 334 Hammond, A. et al., 2016. A CRISPR-Cas9 gene drive system targeting female reproduction in  
335 the malaria mosquito vector *Anopheles gambiae*. *Nature biotechnology*, 34(1), pp.78–83.
- 336 Itokawa, K. et al., 2016. Testing the causality between CYP9M10 and pyrethroid resistance  
337 using the TALEN and CRISPR/Cas9 technologies. *Scientific reports*, 6, p.24652.
- 338 Jones, S.C. et al., 2002. St. Louis encephalitis outbreak in Louisiana in 2001. *The Journal of the*  
339 *Louisiana State Medical Society: official organ of the Louisiana State Medical Society*,  
340 154(6), pp.303–306.
- 341 Kistler, K.E., Vosshall, L.B. & Matthews, B.J., 2015. Genome engineering with CRISPR-Cas9  
342 in the mosquito *Aedes aegypti*. *Cell reports*, 11(1), pp.51–60.
- 343 Koudou, B.G. et al., 2018. Elimination of lymphatic filariasis in west African urban areas: is  
344 implementation of mass drug administration necessary? *The Lancet infectious diseases*,  
345 18(6), pp.e214–e220.
- 346 Kyrou, K. et al., 2018. A CRISPR–Cas9 gene drive targeting doublesex causes complete  
347 population suppression in caged *Anopheles gambiae* mosquitoes. *Nature biotechnology*.  
348 Available at: <https://doi.org/10.1038/nbt.4245>.

- 349 Labun, K. et al., 2016. CHOPCHOP v2: a web tool for the next generation of CRISPR genome  
350 engineering. *Nucleic acids research*, 44(W1), pp.W272–6.
- 351 LaPointe, D.A., Atkinson, C.T. & Samuel, M.D., 2012. Ecology and conservation biology of  
352 avian malaria. *Annals of the New York Academy of Sciences*, 1249(1), pp.211–226.
- 353 LaPointe, D.A., Goff, M.L. & Atkinson, C.T., 2005. Comparative susceptibility of introduced  
354 forest-dwelling mosquitoes in Hawai'i to avian malaria, *Plasmodium relictum*. *The Journal*  
355 *of parasitology*, 91(4), pp.843–849.
- 356 Li, M., Au, L.Y.C., et al., 2017. Generation of heritable germline mutations in the jewel wasp  
357 *Nasonia vitripennis* using CRISPR/Cas9. *Scientific reports*, 7(1), p.901.
- 358 Li, M., Bui, M., et al., 2017. Germline Cas9 expression yields highly efficient genome  
359 engineering in a major worldwide disease vector, *Aedes aegypti*. *Proceedings of the*  
360 *National Academy of Sciences of the United States of America*, 114(49), pp.E10540–  
361 E10549.
- 362 Li, M., Akbari, O.S. & White, B.J., 2018. Highly Efficient Site-Specific Mutagenesis in Malaria  
363 Mosquitoes Using CRISPR. *G3*, 8(2), pp.653–658.
- 364 Li, T. & Liu, N., 2014. Inheritance of permethrin resistance in *Culex quinquefasciatus*. *Journal*  
365 *of medical entomology*, 47(6), pp.1127–1134.
- 366 Petersen, L.R. & Roehrig, J.T., 2001. West Nile virus: a reemerging global pathogen. *Emerging*  
367 *infectious diseases*, 7(4), pp.611–614.
- 368 Reisen, W.K., Fang, Y. & Martinez, V.M., 2005. Avian host and mosquito (Diptera: Culicidae)  
369 vector competence determine the efficiency of West Nile and St. Louis encephalitis virus  
370 transmission. *Journal of medical entomology*, 42(3), pp.367–375.
- 371 Ren, X. et al., 2014. Enhanced specificity and efficiency of the CRISPR/Cas9 system with  
372 optimized sgRNA parameters in *Drosophila*. *Cell reports*, 9(3), pp.1151–1162.
- 373 Severson, D.W. & Behura, S.K., 2012. Mosquito genomics: progress and challenges. *Annual*  
374 *review of entomology*, 57, pp.143–166.
- 375 Xie, S. et al., 2014. sgRNACas9: a software package for designing CRISPR sgRNA and  
376 evaluating potential off-target cleavage sites. *PloS one*, 9(6), p.e100448.
- 377 Xue, W.-H. et al., 2018. CRISPR/Cas9-mediated knockout of two eye pigmentation genes in the  
378 brown planthopper, *Nilaparvata lugens* (Hemiptera: Delphacidae). *Insect biochemistry and*  
379 *molecular biology*, 93, pp.19–26.

380
